# Supplementary material
Source: Springer Nature journal article supplement (https://www.springermedizin.de/resource/supplementary/40478_2013_14_MOESM6_ESM.pdf/25657958)

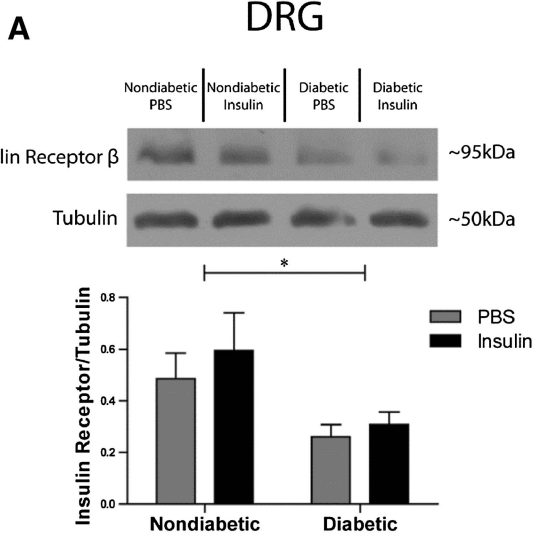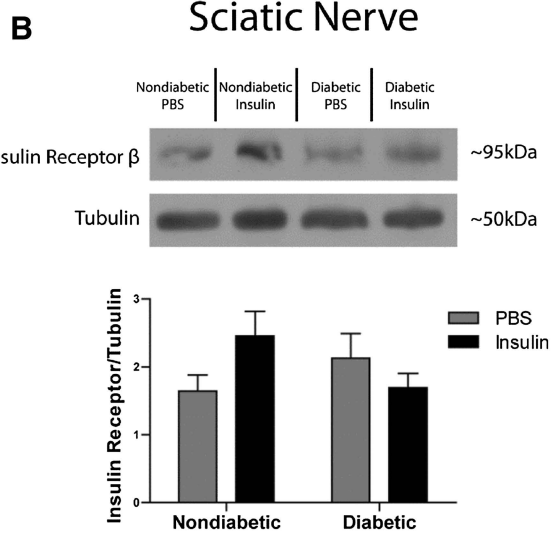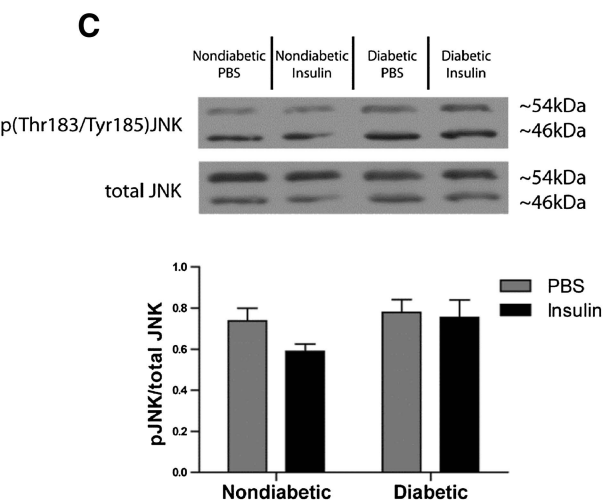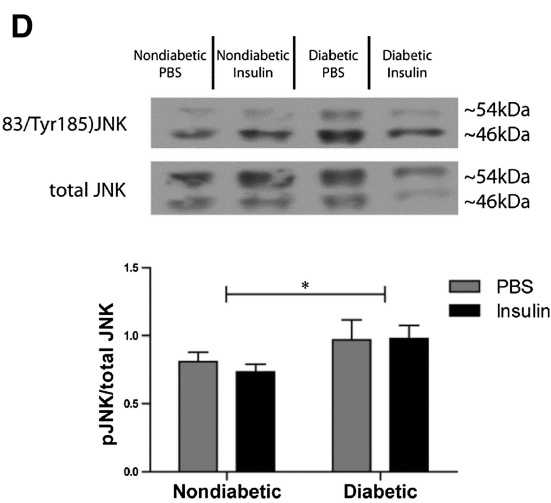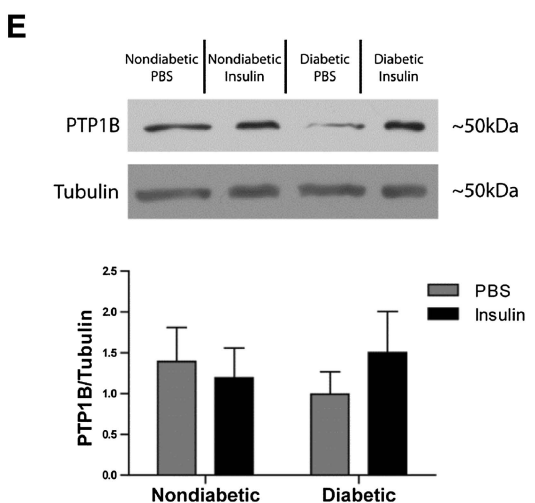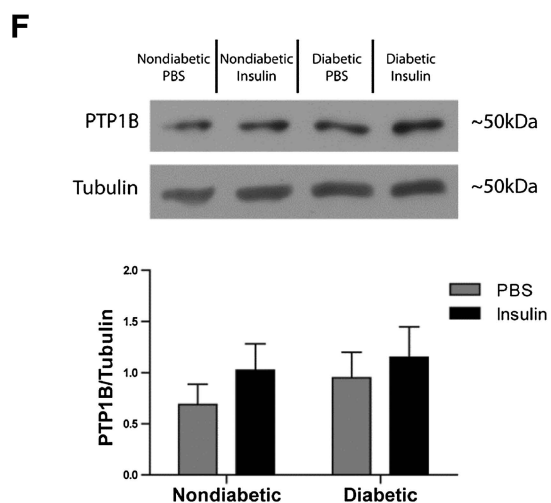

Supplement: MOESM6 [file 25657958]
